# Supplementary material for: Generative AI and Potential for Augmentation: A Data-Driven Analysis of Labor Market in Russia
Source: Research Square preprint supplement (doi:10.21203/rs.3.rs-7173895/v1), 2025-11-03
Supplement: Supplementary file 1 [file cdbd33d648dbc2a9dcb49213.docx]

Appendix

Table A-1

Estimated % of Augmentation Potential of Occupations

| **Occupation** | **Average % of Automation (≥20%)** |
| --- | --- |
| Presentation Designer | 70.6% |
| Dispatcher | 68.4% |
| Product Analyst | 67.4% |
| Writer | 66.7% |
| Data Engineer | 66.3% |
| Marketplace Manager | 65.8% |
| Financial Analyst | 64.6% |
| Head of Analytics Department | 63.3% |
| Procurement Manager | 62.1% |
| Process Engineer | 61.0% |
| Artist | 60.3% |
| Technical Support Specialist | 59.5% |
| SMM Manager | 59.1% |
| Real Estate Agent | 58.8% |
| Coach | 58.7% |
| Recruiter | 57.2% |
| Auditor | 56.0% |
| Targeted Advertising Specialist | 54.8% |
| Frontend Developer | 53.3% |
| Data Analyst | 53.1% |
| Store Director | 52.8% |
| Data Scientist | 51.4% |
| Product Manager | 51.2% |
| Business Analyst | 47.9% |
| Business Trainer | 47.8% |
| Methodologist | 47.7% |
| Analyst | 47.4% |
| Agronomist | 46.3% |
| Project Administrator | 46.1% |
| Tester | 46.1% |
| Oncologist | 45.9% |
| Builder | 44.5% |
| HR Manager | 44.2% |
| Project Manager | 43.9% |
| Cosmetologist | 42.4% |
| Marketer | 42.3% |
| Corporate Psychologist | 42.3% |
| Aviation Technician | 42.1% |
| Cook | 39.5% |
| Systems Analyst | 39.2% |
| Economist | 39.0% |
| Accountant | 38.8% |
| Web Designer | 38.4% |
| Lecturer | 37.8% |
| Commercial Director | 37.7% |
| Sales Manager | 37.7% |
| Teacher | 37.5% |
| 1C Developer | 37.4% |
| Researcher | 37.4% |
| Surveyor | 36.9% |
| Sales Director | 36.7% |
| Translator | 35.5% |
| 1C Analyst | 35.4% |
| Logistics Manager | 35.2% |
| Architect | 34.3% |
| Technologist | 33.0% |
| CEO | 32.3% |
| Python Developer | 31.9% |
| DevOps Engineer | 30.5% |
| Head of Production Department | 29.4% |
| Branch Director | 28.1% |
| Psychologist | 23.3% |
| Lawyer | 22.2% |
| Therapist | 18.8% |
| System Administrator | 17.7% |
| Design Engineer | 16.7% |
| Cashier | 16.5% |
| Driver | 7.6% |
| Nanny | 6.5% |
| Locksmith | 3.8% |
| Security Guard | 2.1% |
| Electrical Installer | 1.0% |
| Turner | 0.1% |
| Courier | 0.2% |
| Laboratory Assistant | 0.0% |
| Welder | 0.0% |
| Tractor Driver | 0.0% |
| Cleaner | 0.0% |
